# Supplementary material for: MMBGX: a method for estimating expression at the isoform level and detecting differential splicing using whole-transcript Affymetrix arrays
Source: PubMed Central journal article supplement — Nucleic Acids Res. 2009 Oct 23;38(1):e4. doi: 10.1093/nar/gkp853 (PMC2800219; doi:10.1093/nar/gkp853), 2009-10-23
Supplement: gkp853_1.pdf [file gkp853_1.pdf]

# MMBGX Supplementary Material

Ernest Turro, Alex Lewin, Anna Rose, Margaret J. Dallman and Sylvia Richardson

August 25, 2009

FIGURE S1. Plot of mean background probe log intensities by GC category and associated central 95% confidence interval on a whole-transcript GeneChip. On the real scale, the variability of non-specific hybridisation within GC categories is very large.

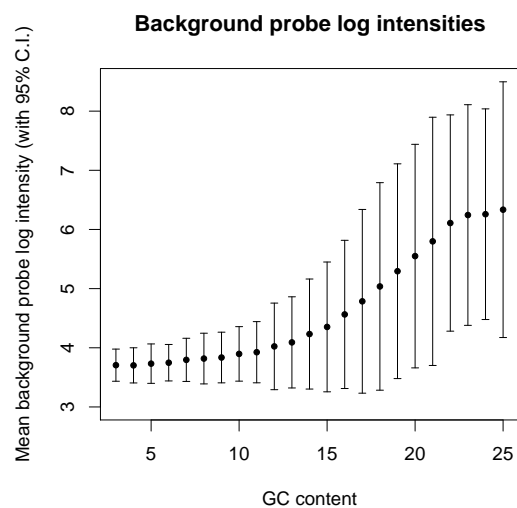

FIGURE S2. Plots showing the means and variances of log PM intensities of single-matching probes against the means and variances of PM intensities of multi-match probes. Each point represent one of the 33 arrays in the Affymetrix human Gene 1.0 ST array tissue mixture data set. Both the means and variances are consistently higher for multi-match probes, supporting the assumption that the contribution to the signal from each transcript is additive.

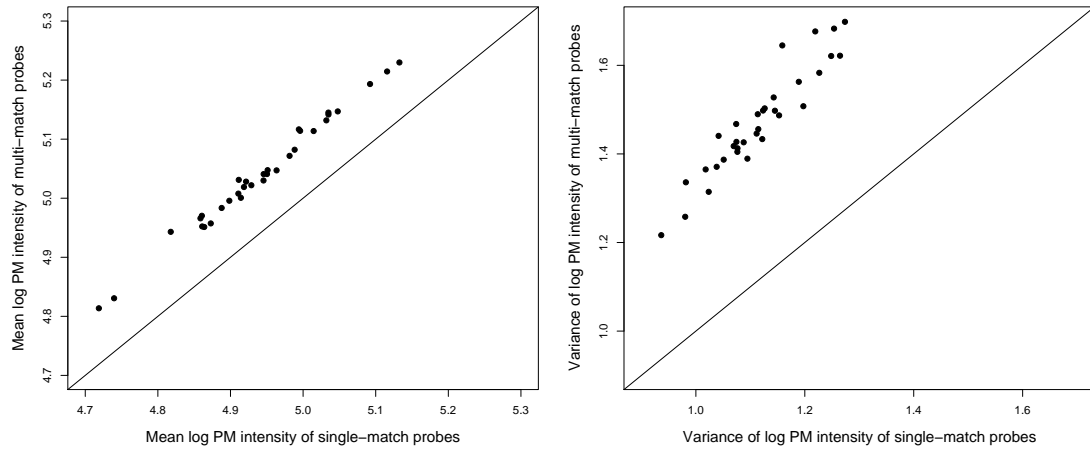

FIGURE S3. Speed-up from parallel computations. A human Gene array analysis was carried out with MMBGX three times using 1, 2, 3, 4, 5, 6, 7 and 8 cores on an 8-core machine. The average speed was recorded and a speedup graph plotted. The base of 2 hours 45 minutes was reduced to only 22 minutes using 8 cores, a speedup of 7.36.

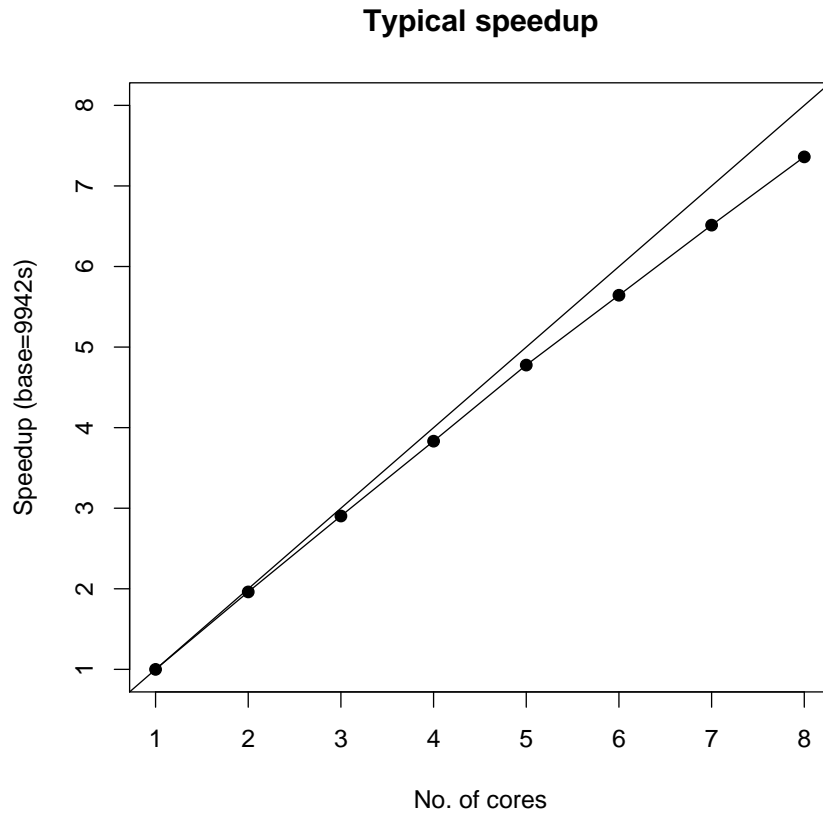

FIGURE S4. We ran MMBGX on a human Gene 1.0 ST array discarding (masking) probes that match to multiple gene-probesets. The two scatterplots show that the standard errors of the log expression measure for probesets without multi-match probes are not affected by the masking while the errors for multi-mapping probesets with at least one single-match probe increase as a result of the masking. The histogram of standard errors for multi-mapping probesets with no single-match probes is mostly within the range of single-mapping probesets (standard error  $< 1.5$ ), indicating that the expression of genes that are completely eliminated by masking can be well estimated by MMBGX.

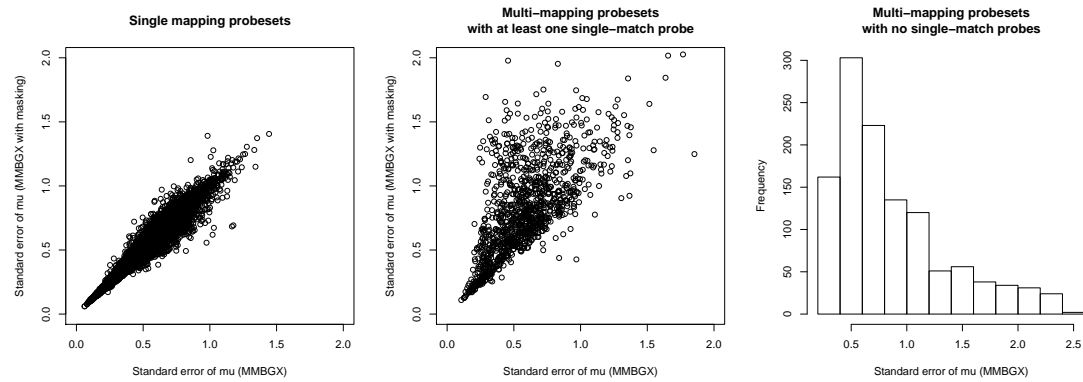

FIGURE S5. Full representation of the 2309 multi-mapping probesets on the human Gene 1.0 ST array. Red dots represent probesets while black dots represent probes. Small groups of two or three probesets are near the periphery of the figure, while more complicated structures appear in the centre.

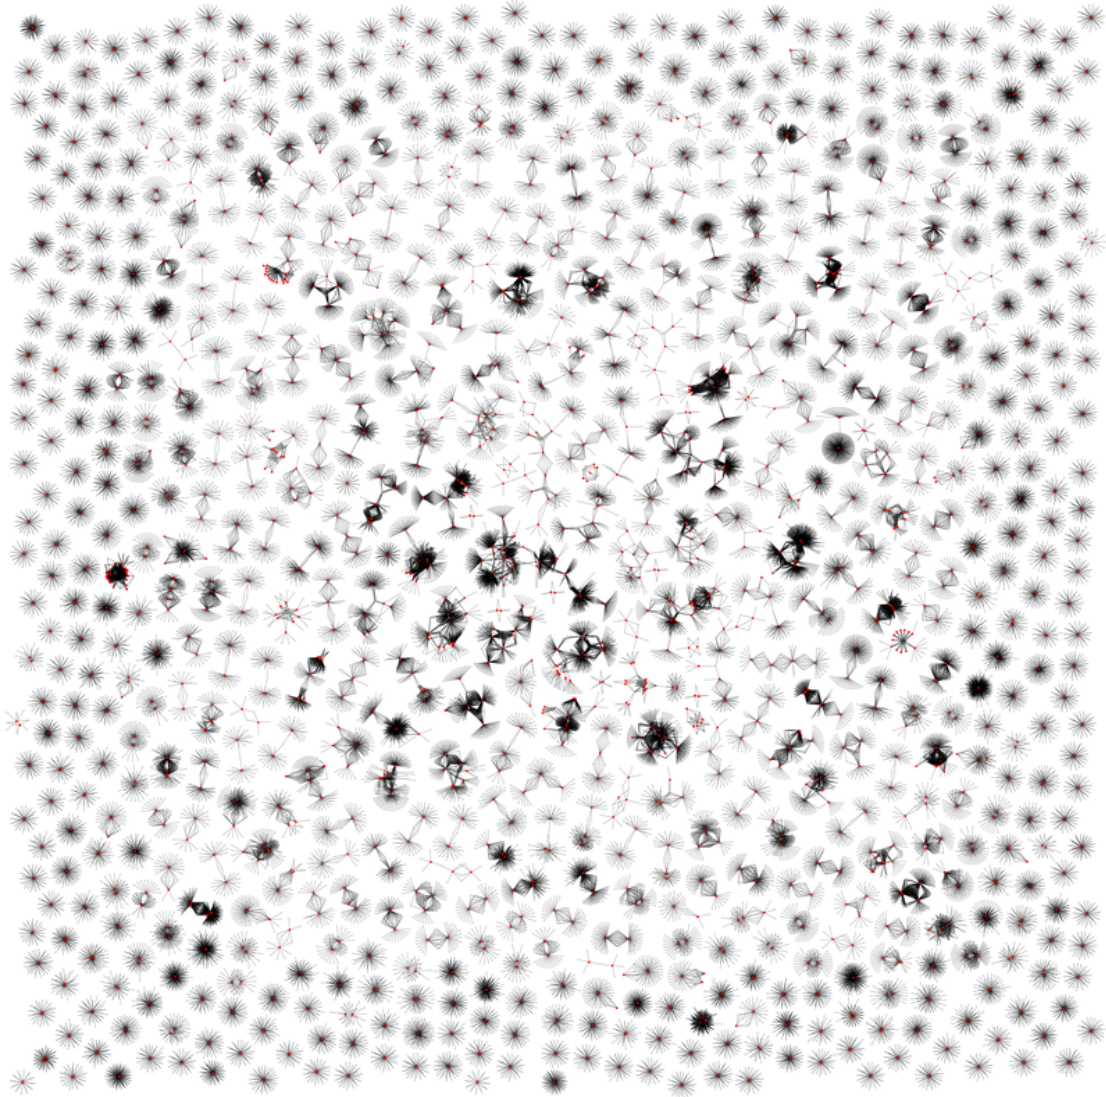

FIGURE S6. Histogram of the proportion of multi-match probes in each transcript-targeting probeset on the human Exon 1.0 ST array. About half the probesets are made up of 90% or less multi-match probes.

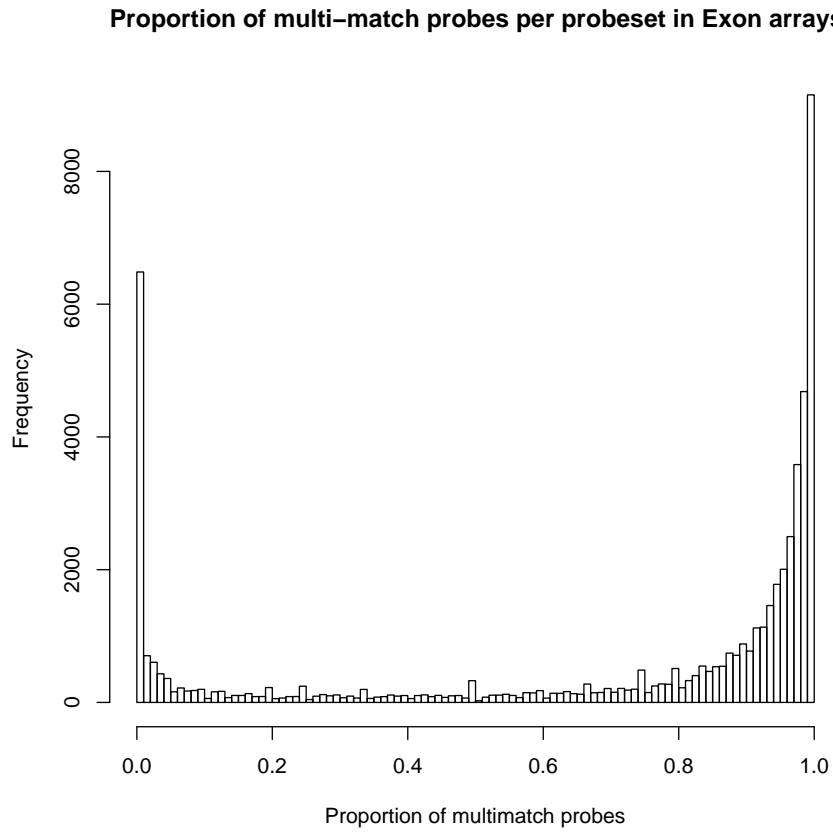

FIGURE S7. Scatterplots showing the performance of MMBGX on simulated Exon array data. MMBGX recovers the signal very well for probesets with less than 90% multi-match probes. There is increased variability and some shrinkage when the proportion of multi-match probes exceeds 90%, but the error in the estimates increases commensurately: 95% central credible intervals from the posterior distributions contain the true simulated value about 95% of the time (not shown).

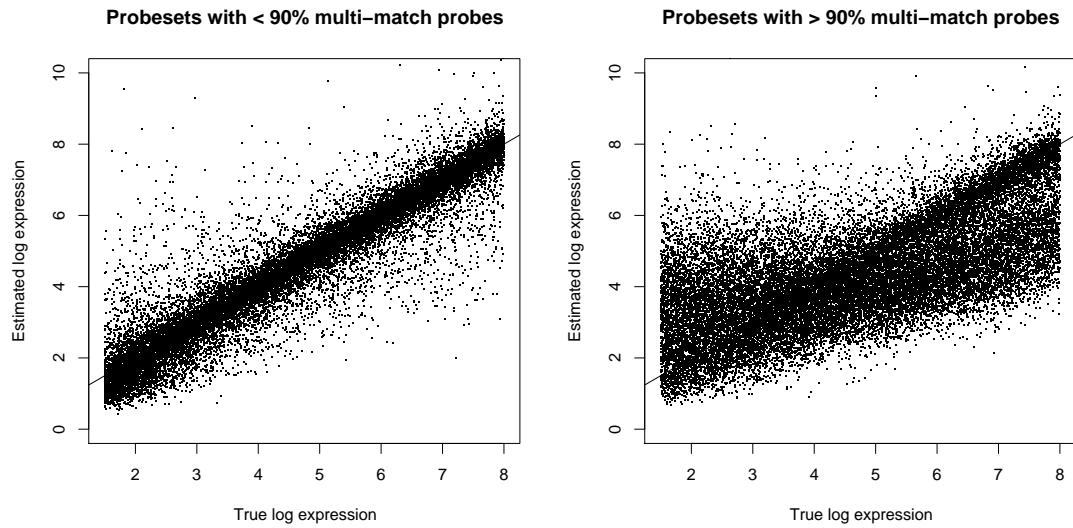

ALGORITHM S1. A fully Bayesian model of  $\alpha_c$ , the mean of the prior on  $\log(\sigma_{gc}^2)$ , exhibited slow mixing of the MCMC sampler, making reliable inference computationally inefficient. We therefore developed an Empirical Bayes algorithm that estimates  $\alpha_c$  very accurately prior to making inference on the other parameters. Before MCMC sampling, the algorithm proceeds once as follows:

1. For each  $k, c, r$ 
  - (a) Set  $\widehat{\gamma}_{kcr}$  to the empirical mean of the logarithm of background probes in affinity category  $k$ , array  $r$  and condition  $c$ .
  - (b) Set  $\widehat{\delta}_{kcr}^2$  to the empirical variance of the logarithm of background probes in affinity category  $k$ , array  $r$  and condition  $c$ .
2. For each  $j, c, r$ 
  - (a) Sample  $\log \widehat{H}_{jcr}$  from  $N(\widehat{\gamma}_{k(j)cr}, \widehat{\delta}_{k(j)cr}^2)$
  - (b) If  $PM_{jcr} - \widehat{H}_{jcr} > 1$ , then  $\widehat{S}_{jcr} := PM_{jcr} - \widehat{H}_{jcr}$ . Otherwise, return to step a.
3. For each  $g, c$ 
  - (a)  $\widehat{\mu}_{gc} := (|R(c)| \cdot |J(g)|)^{-1} \cdot \sum_{R(c)} \sum_{J(g)} \log \frac{\widehat{S}_{jcr}}{|G(j)|}$
  - (b)  $\widehat{\sigma}_{gc}^2 := (|R(c)| \cdot |J(g)| - 1)^{-1} \cdot \sum_{R(c)} \sum_{J(g)} \left[ \log \frac{\widehat{S}_{jcr}}{|G(j)|} \right]^2 - (|R(c)| \cdot |J(g)| / (|R(c)| \cdot |J(g)| - 1)) \cdot \widehat{\mu}_{gc}^2$
4. For each  $c$ 
  - (a)  $\alpha_c := G^{-1} \sum_g \log \widehat{\sigma}_{gc}^2$
  - (b)  $\widehat{\beta}_c^2 := (G - 1)^{-1} \cdot \sum_g \log \left[ \widehat{\sigma}_{gc}^2 \right]^2 - (G / (G - 1)) \cdot \alpha_c^2$ ,

where  $J(g)$  indexes the set of probes matching transcript  $g$ ,  $R(c)$  indexes the set of replicates in condition  $c$ , and  $G$  is the total number of transcripts. In step 2a, we capture the uncertainty in the true intensity of non-specific hybridisation by sampling from the GC-specific empirical distribution,  $N(\widehat{\gamma}_{k(j)cr}, \widehat{\delta}_{k(j)cr}^2)$ . For a given GC category, the lower the value of  $PM_{jcr}$ , the more likely it is that the true  $H_{jcr}$  is located near the leftmost support of its prior distribution. The algorithm captures this property through resampling, essentially truncating  $\widehat{H}_{jcr}$  to a maximum of  $PM_{jcr}$ .

All parameters other than  $\alpha_c$  are estimated using MCMC samplers. In order to speed up convergence, we set the starting values for the samplers to the estimates  $\widehat{S}_{jcr}$ ,  $\widehat{H}_{jcr}$ ,  $\widehat{\mu}_{gc}$ ,  $\widehat{\sigma}_{gc}^2$  and  $\widehat{\beta}_c^2$ .



NOTE S1. Primers for PCR were designed in exons flanking spliced exons for Cd97, B4galt5, Clec5a, Rac1, Csf2rb2 and Slc23a2 with the following primer sequences (5'-3'):

|             |                          |
|-------------|--------------------------|
| mCD97-F     | gagttacacctgcgtctgtaacc  |
| mCD97-R2    | ttccagccttgacgacagatgc   |
| mCD97-R3    | aagtagggaacggtggctcttg   |
| mB4galt5-F1 | catgacgtcgatcacataacctg  |
| mB4galt5-R1 | cttcctcagcagagcgtacctg   |
| mClec5a-F1  | agaaagagatcagatccctgaatc |
| mClec5a-R1  | agtgtggatccttgtgttgac    |
| mRac1-F1    | ctatgggacacagctggacaag   |
| mRac1-R1    | catccctaagatcaagcttcgtc  |
| mCsf2rb2-F1 | tcagtgtcctgtgagctcagtg   |
| mCsf2rb2-F2 | aagcattgaagttctgtggc     |
| mSlc23a2-F1 | tcactacattgctgcagacaac   |
| mSlc23a2-R1 | cttctatcagtgaggacatgatga |

NOTE S2. Despite the gene-level focus of the Gene arrays, Affymetrix has assigned a small number of their probesets to alternative isoforms of the same gene. In these cases, the probe signal captures the expression of multiple alternative isoforms and should be split appropriately.

In the human arrays, a small number of probesets interrogate assemblies other than the reference genome. For example, in the human Gene 1.0 ST arrays, there are probesets that interrogate alternative haplotype assemblies of the chromosome 6 MHC region, the chromosome 22 region containing the CYP2D6 gene or the chromosome 5 region containing the SMN1 gene. In these cases, probes target different versions of the same transcript, and hence their signals should not be split. We therefore discard the probesets mapping to alternative haplotypes and focus on probing only the reference genome.

TABLE S1. MMBGX and Gardina workflow results for genes that tested negative for differential splicing by RT-PCR in Gardina *et al.*.

| Gene     | Probe-set ID     | Forward  | Reverse | Forward Primer        | Reverse Primer          | MMBGX result | MMBGX remarks                                                                                                 | Gardina result |
|----------|------------------|----------|---------|-----------------------|-------------------------|--------------|---------------------------------------------------------------------------------------------------------------|----------------|
| BTNL3    | 2644898          | Ex3      | Ex6     | GGAGTATCCAGTACTCTG    | TCCGTGCTTCTTCCAGT       | Incompatible |                                                                                                               | Positive       |
| CABIN1   | 3939720          | Ex4      | Ex6     | CTTGATCTGCAGAACATGAC  | ATACGAGAGTTGACATCTG     | Incompatible |                                                                                                               | Positive       |
| ENOSF1   | 3795922          | Ex2      | Ex4     | GGTGTGAATACCTCTACT    | AGGCTTCCCTCCGCTTG       | Negative     |                                                                                                               | Positive       |
| FAM44B   | 2887648          | Ex1      | Ex4     | CATCGTGAAGAGCTCAAG    | GCACCTCTATGTAAACCAGATC  | Positive     |                                                                                                               | Positive       |
| FAT      | Ex26             | Ex1      | Ex7     | CTCGAAGTGCAGTCTCTGA   | GCTCATCAATCACCTCATAG    | Negative     | Only 1 unfiltered transcript.                                                                                 | Positive       |
| FAT      | 2797442          | Ex6      | Ex7     | CCTTACTGTGATGGAAAGTG  | GACTTCTGTTCTGGCATCAAG   | Positive     |                                                                                                               | Positive       |
| FN1      | Ex32             | Ex4      | Ex34    | TTAGTGTCTATGCTCAGAATC | CGATATCCAGTGAAGCTGAAC   | Negative     |                                                                                                               | Positive       |
| FN1      | Ex39             | Ex41     | Ex41    | ATTATGTCAATGCCCTGAAG  | GAATAGTACTCAGAAGTG      | Positive     |                                                                                                               | Positive       |
| GBA      | 2437271          | Ex1      | Ex3     | CTGCCCTCAGAGTCTTACTG  | GAAGTAGAAGCAATCCTGTGA   | Positive     |                                                                                                               | Positive       |
| LRP8     | Ex4              | Ex4      | Ex7     | CAGCCACAAGTGTACTCT    | TCCTGAGTCAAGTGCAGATG    | Negative     | One case incompatible, one negative.                                                                          | Positive       |
| LRP8     | 2413218          | Ex14     | Ex19    | CAGACATGAAGAGGTGCTAC  | CATCATCTCAAGGCTTAAATG   | Negative     |                                                                                                               | Positive       |
| NME2     | Ex5              | Ex5      | Ex9     | TGGAGACTTCTGCATCAAG   | GTCCTTCAAGGTTCAATGTAGTG | Incompatible |                                                                                                               | Positive       |
| PFKP     | Ex15             | Ex15     | Ex17a-R | AAATCGGCTGGACAGATGTC  | GCTGACAGCTCCAGSAGT      | Positive     | Two cases incompatible, one negative. All transcripts at very low levels in normal tissue, some up in tumour. | Positive       |
| PFKP     | Ex16             | Ex16     | Ex19    | TGCTGATCATGGTGGATTC   | GTCAGGTGCTCCACGTTG      | Negative     |                                                                                                               | Positive       |
| PFKP     | 3232406          | Ex18-Ext | Ex19    | CTTCTGCACCTCACTCTTG   | GTCAGGTGCTCCACGTTG      | Positive     |                                                                                                               | Positive       |
| PTK9L    | 2676011          | Ex7      | Ex9     | TCTACAGCACCCCTAGTGG   | GACGCTGCAAGTGCCTTC      | Incompatible |                                                                                                               | Positive       |
| RAD51    | 3590094          | Ex3      | Ex8     | GGGAATTAGTAGAGCCAAAG  | GCTACATATCCAGGACATC     | Negative     |                                                                                                               | Positive       |
| SRSF2    | Ex2              | Ex2      | Ex5     | GGAGCGGTCTCCTTAAAG    | GCATACTCAACTGCTTACAC    | Incompatible |                                                                                                               | Positive       |
| STK25    | 2607278          | Ex7      | Ex9     | CTGAAGCAAGTTCATCAC    | CCTCGGCTGCCCTTTGAC      | Incompatible |                                                                                                               | Positive       |
| FIP1L1   | 2727236          | Ex4      | Ex7     | CTCCATCTGGAATGAAGATG  | ATGCTTCCAGGTGCATCAAG    | Incompatible |                                                                                                               | Positive       |
| PLAU     | 3252046          | Ex3      | Ex5     | GCAGCAATGAATTCATCAAG  | GCTGAAGAGCATCAGATCTG    | Incompatible |                                                                                                               | Positive       |
| PTK7     | 2907697, 2907705 | Ex6      | Ex7b    | CCTGSAAGCCACACTTCAAC  | TCCACAGTAGTGAACGTGATTC  | Positive     | All transcripts at very low levels in normal tissue, some up in tumour.                                       | Positive       |
| PTK7     | Ex6              | Ex6      | Ex11    | CCTGSAAGCCACACTTCAAC  | TGAGGCAATGCAAGTGTAG     | Positive     |                                                                                                               | Positive       |
| PTK7     | 2907697, 2907705 | Ex7      | Ex14    | AGACAGGATGTCAACATCAC  | CAATGGTCTGGATCTCTTG     | Negative     |                                                                                                               | Negative       |
| PTK7     | Ex15             | Ex15     | Ex18    | ACAAGTGAATAGTGCACTTC  | GTTGGACAGGTGCTCCATG     | Negative     |                                                                                                               | Negative       |
| RAN      | Ex1              | Ex1      | Ex3     | GGCGTTTGAATTTGGCTTC   | CAAAATCCAGTCAAAATGAC    | Incompatible |                                                                                                               | Positive       |
| TENS1    | 3049621          | Ex12     | Ex17    | CAATGACGCTGTGTACAC    | TCGCGTAAAGGCTGCCCATC    | Incompatible |                                                                                                               | Positive       |
| TNS      | Ex16             | Ex16     | Ex16b   | GTGCTGTGGACTAATACAC   | TTCTGGCTTGGCAACTTTCAG   | Incompatible |                                                                                                               | Positive       |
| CASP4    | 3389310          | Ex2      | Ex5     | TATGCGAGGACAAATGCTTC  | GGCAGATGGTCAAACTCTGT    | Incompatible |                                                                                                               | Positive       |
| CDH11    | 3694667          | Ex12     | Ex14    | CAGAGCCCTACACTTCTGAAC | TCAAAGGCTTCTGTGTCTTC    | Positive     | Both transcripts up in tumour, but by slightly different amounts.                                             | Positive       |
| COL11A1  | 2425849, 2425850 | Ex1_1    | Ex2     | ACAGTACTCTCAGCTTTGTTG | AGCAGTATCTGAGCCITTTAG   | Positive     | Two cases incompatible, one negative. All transcripts at very low levels in normal tissue, some up in tumour. | Positive       |
| COL11A1  | 2425849, 2425850 | Ex1_2    | Ex2     | GGAGCCGTGCTCCTCTAG    | AGCAGTATCTGAGCCITTTAG   | Negative     |                                                                                                               | Positive       |
| COL11A1  | Ex5              | Ex5      | Ex7     | GCATTATAGTCCAGACTGTGA | CTGTCTGGTAACTTCCATTG    | Positive     |                                                                                                               | Positive       |
| CS22     | 3901398          | Ex1      | Ex3     | GAGGGTGGCATCTATGATG   | TCCTTGACACCTGGAAATTCAC  | Incompatible |                                                                                                               | Positive       |
| KIAA1199 | 3604205          | Ex21     | Ex23    | GCATTTCCGAAAGTTTGTG   | GCAGGTTACTGGTCTTGTAG    | Incompatible |                                                                                                               | Positive       |
| MUC4     | 2712246          | Ex23     | Ex25    | ATCCAGCTTGTCTCAGTG    | ACTCCCTCGTGGAAAGCTG     | Incompatible |                                                                                                               | Positive       |
| NACA     | 3458111, 3458123 | Ex2      | Ex7     | TGC TAC AGAGCAGGAGTTG | TTTACTACTGGTTCCTCATC    | Incompatible |                                                                                                               | Positive       |
| NME1     | 3726945          | Ex1      | Ex3     | GTCGAAGTCTCGGAACCA    | GTTTGTATCCAAATGAAGTAC   | Negative     |                                                                                                               | Positive       |
| PSD      | 3304306          | Ex14     | Ex16    | AGAGCGGAGCTCAAGAATG   | CTGCTTTACAGCTCCCTTG     | Incompatible |                                                                                                               | Positive       |
| VEGF     | Ex4              | Ex4      | Ex8     | CACAAAGGCCAGCACATAG   | CTGTATCGATCTGTTCTGATC   | Negative     |                                                                                                               | Negative       |
| NCAM1    | Ex10             | Ex10     | Ex14_2  | AGTCCATGACTTGAAGTG    | CTTACGGGTACGTTGTTTC     | Negative     | One case incompatible, one negative.                                                                          | Negative       |
| NCAM1    | Ex13             | Ex13     | Ex19    | GCATCCAAAGTGGTATGATG  | TCCTGCTTGTATCAGGTTTAC   | Negative     |                                                                                                               | Negative       |
| SH3BP1   | Ex1              | Ex1      | Ex6     | TGGCGACGGGAGCCATAG    | GTAGACGGCCACATGATG      | Negative     |                                                                                                               | Negative       |
| MST1R    | Ex10             | Ex10     | Ex12    | CCAACCTAGTCCCACTAAG   | ACCAAAGGAGCGTGTCTGT     | Negative     |                                                                                                               | Negative       |
| FGR3     | Ex6              | Ex6      | Ex10    | CGTGGAGTTCACACTGCAAG  | TGGTGTGTTGGAGCTCATG     | Negative     |                                                                                                               | Negative       |

TABLE S2. COSIE results for genes the 12 positively validated for which gels were provided and the 36 negatively validated genes in Gardina *et al.*. Transcript clusters or probesets which were filtered by the method are indicated with “NA”.

| Gene     | Tclid   | Psid    | P-value  | Result (FDR < .2;<br>alpha=0.001025257) | Result (FDR<.3);<br>alpha=0.01245986) |
|----------|---------|---------|----------|-----------------------------------------|---------------------------------------|
| ACTN1    | 3569814 | 3569830 | 5.40E-05 | TRUE                                    | TRUE                                  |
| ATP2B4   | 2375706 | 2375764 | 2.85E-03 | FALSE                                   | TRUE                                  |
| VCL      | 3252071 | 3252128 | 1.97E-03 | FALSE                                   | TRUE                                  |
| CALD1    | 3025545 | 3025632 | 1.67E-04 | TRUE                                    | TRUE                                  |
| SLC3A2   | 3333711 | NA      |          |                                         |                                       |
| COL6A3   | 2605321 | 2605386 | 1.54E-05 | TRUE                                    | TRUE                                  |
| CTTN     | 3338552 | 3338589 | 9.81E-02 | FALSE                                   | FALSE                                 |
| FN1      | 2598261 | 2598321 | 1.37E-02 | FALSE                                   | FALSE                                 |
| TPM1     | 3597338 | 3597382 | 4.25E-03 | FALSE                                   | TRUE                                  |
| CD44     | 3326635 | 3326711 | 5.11E-02 | FALSE                                   | FALSE                                 |
| ITGB4    | 3735151 | 3735208 | NA       |                                         |                                       |
| RAC1     | 2989050 | 2989068 | NA       |                                         |                                       |
|          |         |         |          |                                         |                                       |
| BTNL3    | 2844888 | 2844890 | 2.88E-02 | FALSE                                   | FALSE                                 |
| CABIN1   | 3939707 | NA      |          |                                         |                                       |
| ENOSF1   | 3795866 | 3795922 | 8.05E-03 | FALSE                                   | TRUE                                  |
| FAM44B   | 2887633 | NA      |          |                                         |                                       |
| FAT      | 2797393 | 2797410 | 2.51E-03 | FALSE                                   | TRUE                                  |
| FN1      | 2598261 | 2598328 | 9.28E-03 | FALSE                                   | TRUE                                  |
| GBA      | 2437205 | 2437232 | 1.03E-02 | FALSE                                   | TRUE                                  |
| LRP8     | 2413203 | NA      |          |                                         |                                       |
| NME2     | 3726960 | NA      |          |                                         |                                       |
| PFKP     | 3232349 | 3232391 | 2.34E-03 | FALSE                                   | TRUE                                  |
| PTK9L    | 2676009 | NA      |          |                                         |                                       |
| RAD51    | 3590086 | 3590096 | 2.72E-03 | FALSE                                   | TRUE                                  |
| SFRS2    | 3771800 | NA      |          |                                         |                                       |
| STK25    | 2607262 | NA      |          |                                         |                                       |
| FIP1L1   | 2727226 | 2727235 | 1.09E-02 | FALSE                                   | TRUE                                  |
| PLAU     | 3252036 | 3252054 | 1.13E-03 | FALSE                                   | TRUE                                  |
| PTK7     | 2907671 | NA      |          |                                         |                                       |
| RAN      | 3438027 | 3438031 | 5.66E-04 | TRUE                                    | TRUE                                  |
| TENS1    | 3049522 | 3049621 | 1.41E-03 | FALSE                                   | TRUE                                  |
| TNS      | 2599153 | 2599212 | 9.33E-04 | TRUE                                    | TRUE                                  |
| CASP4    | 3389273 | 3389298 | 1.51E-01 | FALSE                                   | FALSE                                 |
| CDH11    | 3694657 | 3694727 | 5.49E-03 | FALSE                                   | TRUE                                  |
| COL11A1  | 2425756 | 2425837 | 1.13E-03 | FALSE                                   | TRUE                                  |
| CST2     | 3901387 | NA      |          |                                         |                                       |
| KIAA1199 | 3604147 | NA      |          |                                         |                                       |
| MUC4     | 2425756 | 2425837 | 1.13E-03 | FALSE                                   | TRUE                                  |
| NACA     | 3458097 | NA      |          |                                         |                                       |
| NME1     | 3726934 | 3726942 | 1.65E-01 | FALSE                                   | FALSE                                 |
| PSD      | 3304301 | NA      |          |                                         |                                       |
| VEGF     | 2908179 | 2908180 | 4.32E-04 | TRUE                                    | TRUE                                  |
| NCAM1    | 3349293 | 3349364 | 1.10E-02 | FALSE                                   | TRUE                                  |
| SIAHBP1  | 3157817 | NA      |          |                                         |                                       |
| MST1R    | 2674919 | 2674958 | 3.62E-03 | FALSE                                   | TRUE                                  |
| FGFR3    | 2715016 | NA      |          |                                         |                                       |

TABLE S3. FIRMA results for genes the 12 positively validated for which gels were provided and the 36 negatively validated genes in Gardina *et al.*. Transcript clusters or probesets which were filtered by the method are indicated with “NA”.

| Gene     | Tcld    | Psld    | P-value  | Result (FDR <.2;<br>alpha=4.4774e-05) | Result (FDR<.3);<br>alpha= 0.003178101) |
|----------|---------|---------|----------|---------------------------------------|-----------------------------------------|
| ACTN1    | 3569814 | 3569830 | 1.58E-04 | FALSE                                 | TRUE                                    |
| ATP2B4   | 2375706 | 2375766 | 2.55E-03 | FALSE                                 | TRUE                                    |
| VCL      | 3252071 | 3252128 | 6.43E-06 | TRUE                                  | TRUE                                    |
| CALD1    | 3025545 | 3025632 | 1.44E-04 | FALSE                                 | TRUE                                    |
| SLC3A2   | 3333711 | 3333717 | 8.88E-01 | FALSE                                 | FALSE                                   |
| COL6A3   | 2605321 | 2605386 | 6.28E-03 | FALSE                                 | FALSE                                   |
| CTTN     | 3338552 | 3338589 | 3.83E-03 | FALSE                                 | FALSE                                   |
| FN1      | 2598261 | 2598321 | 7.47E-03 | FALSE                                 | FALSE                                   |
| TPM1     | 3597338 | 3597382 | 1.20E-02 | FALSE                                 | FALSE                                   |
| CD44     | 3326635 | 3326714 | 5.52E-02 | FALSE                                 | FALSE                                   |
| ITGB4    | 3735151 | 3735208 | NA       |                                       |                                         |
| RAC1     | 2989050 | 2989068 | 3.07E-02 | FALSE                                 | FALSE                                   |
|          |         |         |          |                                       |                                         |
| BTNL3    | 2844888 | 2844898 | 2.87E-02 | FALSE                                 | FALSE                                   |
| CABIN1   | 3939707 | 3939739 | 6.02E-03 | FALSE                                 | FALSE                                   |
| ENOSF1   | 3795866 | 3795922 | 3.45E-02 | FALSE                                 | FALSE                                   |
| FAM44B   | 2887633 | 2887648 | 1.23E-03 | FALSE                                 | TRUE                                    |
| FAT      | 2797393 | 2797449 | 4.15E-02 | FALSE                                 | FALSE                                   |
| FN1      | 2598261 | 2598330 | 8.82E-04 | FALSE                                 | TRUE                                    |
| GBA      | 2437205 | 2437223 | 1.04E-01 | FALSE                                 | FALSE                                   |
| LRP8     | 2413203 | 2413218 | 3.04E-04 | FALSE                                 | TRUE                                    |
| NME2     | 3726960 | 3726971 | 3.68E-02 | FALSE                                 | FALSE                                   |
| PFKP     | 3232349 | 3232365 | 5.78E-03 | FALSE                                 | FALSE                                   |
| PTK9L    | 2676009 | 2676018 | 3.10E-03 | FALSE                                 | TRUE                                    |
| RAD51    | 3590086 | 3590096 | 4.51E-03 | FALSE                                 | FALSE                                   |
| SFRS2    | 3771800 | 3771810 | 6.05E-03 | FALSE                                 | FALSE                                   |
| STK25    | 2607262 | 2607278 | 3.49E-03 | FALSE                                 | FALSE                                   |
| FIP1L1   | 2727226 | 2727235 | 2.70E-03 | FALSE                                 | TRUE                                    |
| PLAU     | 3252036 | 3252051 | 2.16E-04 | FALSE                                 | TRUE                                    |
| PTK7     | 2907671 | 2907707 | 1.94E-04 | FALSE                                 | TRUE                                    |
| RAN      | 3438027 | 3438033 | 9.65E-04 | FALSE                                 | TRUE                                    |
| TENS1    | 3049522 | 3049643 | 1.87E-03 | FALSE                                 | TRUE                                    |
| TNS      | 2599153 | 2599225 | 6.07E-03 | FALSE                                 | FALSE                                   |
| CASP4    | 3389273 | 3389317 | 2.93E-02 | FALSE                                 | FALSE                                   |
| CDH11    | 3694657 | 3694703 | 3.98E-04 | FALSE                                 | TRUE                                    |
| COL11A1  | 2425756 | 2425850 | 6.15E-06 | TRUE                                  | TRUE                                    |
| CST2     | 3901387 | 3901398 | 2.19E-04 | FALSE                                 | TRUE                                    |
| KIAA1199 | 3604147 | 3604213 | 1.09E-04 | FALSE                                 | TRUE                                    |
| MUC4     | 2425756 | 2425850 | 6.15E-06 | TRUE                                  | TRUE                                    |
| NACA     | 3458097 | 3458098 | 1.93E-02 | FALSE                                 | FALSE                                   |
| NME1     | 3726934 | 3726957 | 7.38E-03 | FALSE                                 | FALSE                                   |
| PSD      | 3304301 | 3304306 | 1.78E-03 | FALSE                                 | TRUE                                    |
| VEGF     | 2908179 | 2908192 | 1.29E-03 | FALSE                                 | TRUE                                    |
| NCAM1    | 3349293 | 3349296 | 3.76E-04 | FALSE                                 | TRUE                                    |
| SIAHBP1  | 3157817 | 3157827 | 5.22E-03 | FALSE                                 | FALSE                                   |
| MST1R    | 2674919 | 2674946 | 4.32E-02 | FALSE                                 | FALSE                                   |
| FGFR3    | 2715016 | 2715045 | 4.72E-02 | FALSE                                 | FALSE                                   |
